# Supplementary material
Source: MDPI journal article supplement (https://www.mdpi.com/2071-1050/12/11/4351)
Supplement: s1 [file s1]

## Table S1. Knowledge survey

The knowledge survey of the serious game SEGAE is made up of the following questions. When students completed the survey, all questions were randomly mixed and the question themes (e.g., Crop production) were not available.

| Crop production                                                                                                                                                                    |
|------------------------------------------------------------------------------------------------------------------------------------------------------------------------------------|
| <b>Impact of permanent grassland on earthworm abundance</b><br>Positive<br>Negative<br>I don't know                                                                                |
| <b>Impact of permanent grassland on earthworm abundance</b><br>Positive Agroforestry<br>Diverse crop rotation<br>Residues left on soil<br>I don't know                             |
| <b>Which tillage system will have the most positive effect on soil fauna?</b><br>Reduced tillage<br>Conventional tillage<br>No tillage<br>I don't know                             |
| <b>Can agroforestry reduce pesticides use?</b><br>Yes<br>No<br>I don't know                                                                                                        |
| <b>Introducing three-year grassland period into cereal rotation will increase total crop production value but does it increase farmer income too?</b><br>Yes<br>No<br>I don't know |
| <b>How will input costs change when introducing legumes in grasslands?</b><br>Decrease<br>Stay at the same level<br>Increase<br>I don't know                                       |
| <b>How does your annual work time change if you go from conventional tillage to no tillage?</b><br>Decrease<br>Stay at the same level<br>Increase<br>I don't know                  |
| <b>What is the effect of biocontrol products on user health risks?</b><br>Decrease<br>Stay at the same level<br>Increase<br>I don't know                                           |
| <b>Name 3 benefits of intercropping</b><br>[open question]                                                                                                                         |
| <b>Name 3 benefits of cover crops</b><br>[open question]                                                                                                                           |

| Animal production                                                                                                                                                                                                              |
|--------------------------------------------------------------------------------------------------------------------------------------------------------------------------------------------------------------------------------|
| <p><b>The feeding system does not have an influence on greenhouse gas emissions.</b></p> <p>Yes</p> <p>No</p> <p>I don't know</p>                                                                                              |
| <p><b>Cow housing can increase milk yield.</b></p> <p>Yes</p> <p>No</p> <p>I don't know</p>                                                                                                                                    |
| <p><b>What is/are the effect(s) of using local cow breeds?</b></p> <p>Higher yield</p> <p>Lower yield</p> <p>Resilience</p> <p>Intensification</p> <p>Higher veterinary costs</p> <p>Lower veterinary costs</p>                |
| <p><b>Which practice(s) can improve animal welfare?</b></p> <p>Pasture grazing</p> <p>Once a day milking</p> <p>Antibiotic treatments</p> <p>Reduced age at first calving</p> <p>None of them</p> <p>Increased cow density</p> |
| General                                                                                                                                                                                                                        |
| <p><b>Hedge's implantation will increase biodiversity but at the expense of productivity loss.</b></p> <p>True</p> <p>False</p> <p>I don't know</p>                                                                            |
| <p><b>Agroecological practices tend to increase labor costs.</b></p> <p>Yes</p> <p>No</p> <p>I don't know</p>                                                                                                                  |
| <p><b>How will pollinators influence wheat yield?</b></p> <p>Decrease</p> <p>Stay at the same level</p> <p>Increase</p>                                                                                                        |
| <p><b>How agroforestry practices can improve crop and animal productivity?</b></p> <p>[open question]</p>                                                                                                                      |
| <p><b>How can we benefit from low-production landraces and cultivars in agroecological systems?</b></p> <p>[open question]</p>                                                                                                 |
| <p><b>Does a diversified agroecosystem tend to be more stable? (Give arguments against and for this proposition)</b></p> <p>[open question]</p>                                                                                |
| <p><b>Name 3 constraints of organic fertilization</b></p> <p>[open question]</p>                                                                                                                                               |
